# Supplementary material for: Emotional Imagery Influences the Adaptive Force in Young Women: Unpleasant Imagery Reduces Instantaneously the Muscular Holding Capacity
Source: MDPI journal article supplement (doi:10.3390/brainsci12101318), 2022-09-29
Supplement: s1 [file s1]

## Supplementary Material

Article

### ***Emotional imagery influences the Adaptive Force in young women: unpleasant imagery reduces instantaneously the muscular holding capacity***

Schaefer LV, Dech S, Wolff LL, Bittmann FN

#### Content

|                                                                                         |    |
|-----------------------------------------------------------------------------------------|----|
| Table S1. Anthropometric data .....                                                     | 2  |
| Table S2. Tester's ratings of manual muscle tests .....                                 | 3  |
| Table S3. Maximal Adaptive Force ( $AF_{max}$ ) of elbow flexors .....                  | 4  |
| Table S4. Maximal Adaptive Force ( $AF_{max}$ ) of hip flexors .....                    | 5  |
| Table S5. Maximal isometric Adaptive Force ( $AF_{iso_{max}}$ ) of elbow flexors .....  | 6  |
| Table S6. Maximal isometric Adaptive Force ( $AF_{iso_{max}}$ ) of hip flexors .....    | 7  |
| Table S7. Adaptive Force at onset of oscillations ( $AF_{osc}$ ) of elbow flexors ..... | 8  |
| Table S8. Adaptive Force at onset of oscillations ( $AF_{osc}$ ) of hip flexors .....   | 9  |
| Table S9. Slope of force rise of elbow flexors .....                                    | 10 |
| Table S10. Slope of force rise of hip flexors .....                                     | 11 |

Table S1. Anthropometric data

**Table S1.** Anthropometric data of each participant: gender (female = 1), age (years), height (cm), mass (kg)) including arithmetic mean (M) and standard deviation (SD).

| participant | gender | age (yrs.) | height (cm) | mass (kg) |
|-------------|--------|------------|-------------|-----------|
| 1           | 1      | 22         | 180         | 80        |
| 2           | 1      | 25         | 165         | 58        |
| 3           | 1      | 23         | 171         | 63        |
| 4           | 1      | 30         | 177         | 72        |
| 5           | 1      | 26         | 180         | 70        |
| 6           | 1      | 26         | 160         | 54        |
| 7           | 1      | 20         | 177         | 69        |
| 8           | 1      | 25         | 168         | 60        |
| 9           | 1      | 23         | 177         | 68        |
| 10          | 1      | 20         | 170         | 60        |
| 11          | 1      | 30         | 165         | 57        |
| 12          | 1      | 29         | 158         | 58        |
| M           |        | 24.92      | 170.67      | 64.08     |
| SD          |        | 3.50       | 7.63        | 7.69      |

Table S2. Tester's ratings of manual muscle tests

**Table S2.** Results of tester's manual muscle test (MMT) ratings of elbow (1) and hip (2) flexors: unstable = 0, stable = 1, indifferent = 2 of baseline (base), pleasant (pleas) and unpleasant (unpl) imagery for each trial (\_1 to \_3 refers to number of trial) of each participant.

| elbow flexors    |                  |        |        |         |         |         |        |        |        |
|------------------|------------------|--------|--------|---------|---------|---------|--------|--------|--------|
| Partici-<br>pant | tested<br>muscle | base_1 | base_2 | pleas_1 | pleas_2 | pleas_3 | unpl_1 | unpl_2 | unpl_3 |
| 1                | 1                | 1      | 1      | 1       | 1       | 0       | 1      | 1      | 0      |
| 2                | 1                | 1      | 1      | 1       | 1       | 1       | 0      | 0      | 0      |
| 3                | 1                | 1      | 1      | 1       | 0       | 1       | 0      | 0      | 0      |
| 4                | 1                | 1      | 1      | 1       | 1       | 1       | 0      | 0      | 0      |
| 5                | 1                | 1      | 1      | 1       | 1       | 1       | 0      | 0      | 0      |
| 6                | 1                | 1      | 1      | 1       | 1       | 1       | 0      | 0      | 0      |
| 7                | -                | -      | -      | -       | -       | -       | -      | -      | -      |
| 8                | 1                | 1      | 1      | 1       | 1       | 1       | 0      | 0      | 0      |
| 9                | 1                | 1      | -      | 1       | 1       | 0       | 0      | 0      | 0      |
| 10               | -                | -      | -      | -       | -       | -       | -      | -      | -      |
| 11               | 1                | 1      | 1      | -       | 1       | 1       | 0      | 0      | 1      |
| 12               | 1                | 1      | 1      | 1       | 1       | 1       | 0      | 0      | 0      |
| hip flexors      |                  |        |        |         |         |         |        |        |        |
| 1                | 2                | -      | -      | -       | -       | -       | -      | -      | -      |
| 2                | 2                | 1      | 1      | 1       | 1       | 1       | 0      | 0      | 0      |
| 3                | 2                | 1      | 1      | 1       | 1       | 1       | 0      | -      | 0      |
| 4                | 2                | 1      | 1      | 1       | 1       | 1       | 0      | 0      | 0      |
| 5                | 2                | 1      | 1      | 1       | -       | 1       | 0      | 0      | 0      |
| 6                | 2                | 1      | 1      | 1       | 1       | 0       | 0      | 2      | 0      |
| 7                | 2                | -      | 1      | 1       | 1       | 1       | 0      | 0      | 1      |
| 8                | 2                | 1      | 1      | 1       | -       | 1       | 0      | 0      | 0      |
| 9                | 2                | 1      | 1      | 1       | 1       | 0       | 0      | 1      | 0      |
| 10               | 2                | 1      | 1      | 1       | -       | 0       | 0      | 2      | 0      |
| 11               | 2                | 1      | 1      | 1       | 1       | 1       | 0      | 0      | 0      |
| 12               | 2                | 1      | 1      | 0       | 1       | 1       | 0      | 2      | 0      |

**Table S3.** Maximal Adaptive Force ( $AF_{max}$ ) (N) of elbow flexors for baseline as well as pleasant and unpleasant imagery for each participant and trial. The maximal value of all trials ( $maxAF_{max}$ ) is given, too. Furthermore, the individual and group arithmetic means (M), standard deviations (SD) and coefficient of variation (CV) are displayed.

| elbow flexors |        |        |          |         |        |            |        |        |          |       |      |          |       |      |            |       |      |                      |  |  |        |
|---------------|--------|--------|----------|---------|--------|------------|--------|--------|----------|-------|------|----------|-------|------|------------|-------|------|----------------------|--|--|--------|
| baseline      |        |        | pleasant |         |        | unpleasant |        |        | baseline |       |      | pleasant |       |      | unpleasant |       |      | maxAF <sub>max</sub> |  |  |        |
| M1            | M2     |        | M1       | M2      | M3     | M1         | M2     | M3     | M        | SD    | CV   | M        | SD    | CV   | M          | SD    | CV   |                      |  |  |        |
| 1             | 134.28 | 133.33 | 176.60   | 138.36  | 256.91 | 166.30     | 149.94 | 242.82 | 133.80   | 0.68  | 0.01 | 190.62   | 60.50 | 0.32 | 186.35     | 49.58 | 0.27 | 256.91               |  |  |        |
| 2             | 180.98 | 216.94 | 182.07   | 201.48  | 217.72 | 137.94     | 142.98 | 136.42 | 198.96   | 25.43 | 0.13 | 200.42   | 17.85 | 0.09 | 139.11     | 3.44  | 0.02 | 217.72               |  |  |        |
| 3             | 152.78 | 153.43 | 142.58   | 157.58  | 151.04 | 156.46     | 143.35 | 138.18 | 153.10   | 0.46  | 0.00 | 150.40   | 7.52  | 0.05 | 146.00     | 9.42  | 0.06 | 157.58               |  |  |        |
| 4             | 159.87 | 179.68 | 219.803  | 192.634 | 184.99 | 175.09     | 243.62 | 202.40 | 169.78   | 14.01 | 0.08 | 199.14   | 18.30 | 0.09 | 207.03     | 34.50 | 0.17 | 243.62               |  |  |        |
| 5             | 161.99 | 148.69 | 133.893  | 151.39  | 167.05 | 187.33     | 189.03 | 181.66 | 155.34   | 9.41  | 0.06 | 150.78   | 16.59 | 0.11 | 186.01     | 3.86  | 0.02 | 189.03               |  |  |        |
| 6             | 155.31 | 133.08 | 148.50   | 143.79  | 157.88 | 206.32     | 185.43 | 177.10 | 144.20   | 15.72 | 0.11 | 150.05   | 7.17  | 0.05 | 189.62     | 15.05 | 0.08 | 206.32               |  |  |        |
| 7             | -      | -      | -        | -       | -      | -          | -      | -      | -        | -     | -    | -        | -     | -    | -          | -     | -    | -                    |  |  |        |
| 8             | 78.36  | 91.76  | 92.75    | 93.90   | 101.61 | 140.11     | 127.82 | 162.36 | 85.06    | 9.47  | 0.11 | 96.09    | 4.82  | 0.05 | 143.43     | 17.51 | 0.12 | 162.36               |  |  |        |
| 9             | 164.91 | -      | 175.94   | 172.37  | 185.04 | 194.60     | 184.76 | 179.21 | 164.91   | -     | -    | 177.79   | 6.53  | 0.04 | 186.19     | 7.79  | 0.04 | 194.60               |  |  |        |
| 10            | -      | -      | -        | -       | -      | -          | -      | -      | -        | -     | -    | -        | -     | -    | -          | -     | -    | -                    |  |  |        |
| 11            | 166.57 | 200.72 | -        | 154.31  | 142.89 | 158.48     | 132.85 | 101.84 | 183.64   | 24.15 | 0.13 | 148.60   | 8.08  | 0.05 | 131.06     | 28.36 | 0.22 | 200.72               |  |  |        |
| 12            | 187.59 | 172.32 | 168.58   | 166.52  | 167.86 | 168.25     | 169.76 | 195.47 | 179.96   | 10.80 | 0.06 | 167.65   | 1.04  | 0.01 | 177.83     | 15.30 | 0.09 | 195.47               |  |  |        |
|               |        |        |          |         |        |            |        |        | M        |       |      | 156.87   |       |      | 163.15     |       |      | 169.26               |  |  | 202.43 |
|               |        |        |          |         |        |            |        |        | SD       |       |      | 31.83    |       |      | 31.39      |       |      | 26.56                |  |  | 31.31  |
|               |        |        |          |         |        |            |        |        | CV       |       |      | 0.20     |       |      | 0.19       |       |      | 0.16                 |  |  | 0.15   |

**Table S4.** Maximal Adaptive Force ( $AF_{max}$ ) (N) of hip flexors for baseline as well as pleasant and unpleasant imagery for each participant and trial. The maximal value of all trials ( $maxAF_{max}$ ) is given, too. Furthermore, the individual and group arithmetic means (M), standard deviations (SD) and coefficient of variation (CV) are displayed.

| hip flexors |        |        |          |        |        |            |        |        |          |       |      |          |       |      |            |       |      |                      |  |  |        |
|-------------|--------|--------|----------|--------|--------|------------|--------|--------|----------|-------|------|----------|-------|------|------------|-------|------|----------------------|--|--|--------|
| baseline    |        |        | pleasant |        |        | unpleasant |        |        | baseline |       |      | pleasant |       |      | unpleasant |       |      | maxAF <sub>max</sub> |  |  |        |
| M1          | M2     |        | M1       | M2     | M3     | M1         | M2     | M3     | M        | SD    | CV   | M        | SD    | CV   | M          | SD    | CV   |                      |  |  |        |
| 1           | -      | -      | -        | -      | -      | -          | -      | -      | -        | -     | -    | -        | -     | -    | -          | -     | -    | -                    |  |  |        |
| 2           | 200.02 | 171.11 | 192.09   | 208.92 | 174.84 | 160.75     | 186.32 | 173.03 | 185.56   | 20.44 | 0.11 | 191.95   | 17.04 | 0.09 | 173.37     | 12.79 | 0.07 | 208.92               |  |  |        |
| 3           | 184.54 | 155.64 | 169.87   | 189.10 | 190.14 | 191.20     | -      | 166.16 | 170.09   | 20.43 | 0.12 | 183.03   | 11.42 | 0.06 | 178.68     | 17.71 | 0.10 | 191.20               |  |  |        |
| 4           | 149.36 | 172.58 | 217.09   | 205.66 | 186.63 | 243.10     | 229.11 | 251.44 | 160.97   | 16.42 | 0.10 | 203.13   | 15.39 | 0.08 | 241.22     | 11.28 | 0.05 | 251.44               |  |  |        |
| 5           | 167.05 | 156.08 | 166.10   | -      | 143.41 | 181.07     | 215.89 | 225.55 | 161.57   | 7.76  | 0.05 | 154.76   | 16.05 | 0.10 | 207.50     | 23.40 | 0.11 | 225.55               |  |  |        |
| 6           | 168.04 | 121.55 | 113.60   | 127.77 | 205.79 | 143.60     | 103.26 | 205.84 | 144.80   | 32.88 | 0.23 | 149.05   | 49.64 | 0.33 | 150.90     | 51.68 | 0.34 | 205.84               |  |  |        |
| 7           | -      | 161.92 | 159.94   | 180.48 | 160.05 | 226.40     | 215.95 | 178.12 | 161.92   | -     | -    | 166.82   | 11.83 | 0.07 | 206.82     | 25.40 | 0.12 | 226.40               |  |  |        |
| 8           | 132.87 | 100.45 | 93.83    | -      | 89.96  | 192.85     | 185.90 | 203.19 | 116.66   | 22.93 | 0.20 | 91.90    | 2.74  | 0.03 | 193.98     | 8.70  | 0.04 | 203.19               |  |  |        |
| 9           | 155.62 | 150.77 | 147.84   | 171.14 | 234.10 | 187.86     | 133.33 | 200.37 | 153.20   | 3.43  | 0.02 | 184.36   | 44.63 | 0.24 | 173.85     | 35.64 | 0.21 | 234.10               |  |  |        |
| 10          | 178.00 | 168.49 | 196.12   | -      | 249.70 | 259.60     | 181.20 | 207.92 | 173.25   | 6.72  | 0.04 | 222.91   | 37.89 | 0.17 | 216.24     | 39.85 | 0.18 | 259.60               |  |  |        |
| 11          | 144.25 | 152.97 | 153.11   | 143.64 | 134.19 | 175.93     | 156.58 | 147.80 | 148.61   | 6.17  | 0.04 | 143.65   | 9.46  | 0.07 | 160.10     | 14.39 | 0.09 | 175.93               |  |  |        |
| 12          | 164.07 | 169.85 | 202.91   | 134.71 | 152.08 | 147.43     | 147.09 | 169.04 | 166.96   | 4.08  | 0.02 | 163.23   | 35.44 | 0.22 | 154.52     | 12.58 | 0.08 | 202.91               |  |  |        |
|             |        |        |          |        |        |            |        |        | M        |       |      | 158.51   |       |      | 168.62     |       |      | 187.02               |  |  | 216.82 |
|             |        |        |          |        |        |            |        |        | SD       |       |      | 18.02    |       |      | 35.01      |       |      | 28.58                |  |  | 25.27  |
|             |        |        |          |        |        |            |        |        | CV       |       |      | 0.11     |       |      | 0.21       |       |      | 0.15                 |  |  | 0.12   |

**Table S5.** Maximal isometric Adaptive Force ( $AF_{iso_{max}}$ ) (N) of elbow flexors for baseline as well as pleasant and unpleasant imagery for each participant and trial. The individual and group arithmetic means (M), standard deviations (SD) and coefficient of variation (CV) are given.

|    | baseline |        | pleasant |        |        | unpleasant |        |        | baseline |       |      | pleasant |       |      | unpleasant |       |      |
|----|----------|--------|----------|--------|--------|------------|--------|--------|----------|-------|------|----------|-------|------|------------|-------|------|
|    | M1       | M2     | M1       | M2     | M3     | M1         | M2     | M3     | M        | SD    | CV   | M        | SD    | CV   | M          | SD    | CV   |
| 1  | 134.28   | 133.33 | 176.60   | 138.36 | 156.01 | 166.30     | 149.94 | 119.93 | 133.80   | 0.68  | 0.01 | 156.99   | 19.14 | 0.12 | 145.39     | 23.52 | 0.16 |
| 2  | 180.98   | 216.94 | 182.07   | 201.48 | 217.72 | 75.68      | 66.98  | 77.52  | 198.96   | 25.43 | 0.13 | 200.42   | 17.85 | 0.09 | 73.40      | 5.63  | 0.08 |
| 3  | 152.78   | 153.43 | 142.58   | 108.16 | 151.04 | 98.85      | 125.05 | 100.20 | 153.10   | 0.46  | 0.00 | 133.92   | 22.71 | 0.17 | 108.03     | 14.75 | 0.14 |
| 4  | 159.87   | 179.68 | 219.80   | 192.63 | 184.99 | 42.64      | 116.40 | 40.43  | 169.78   | 14.01 | 0.08 | 199.14   | 18.30 | 0.09 | 66.49      | 43.24 | 0.65 |
| 5  | 161.99   | 148.69 | 133.89   | 151.39 | 167.05 | 54.91      | 39.78  | 62.72  | 155.34   | 9.41  | 0.06 | 150.78   | 16.59 | 0.11 | 52.47      | 11.66 | 0.22 |
| 6  | 155.31   | 133.08 | 148.50   | 143.79 | 157.88 | 139.75     | 116.17 | 87.29  | 144.20   | 15.72 | 0.11 | 150.05   | 7.17  | 0.05 | 114.40     | 26.28 | 0.23 |
| 7  | -        | -      | -        | -      | -      | -          | -      | -      | -        | -     | -    | -        | -     | -    | -          | -     | -    |
| 8  | 78.36    | 91.76  | 92.75    | 93.90  | 101.61 | 32.22      | 33.08  | 33.88  | 85.06    | 9.47  | 0.11 | 96.09    | 4.82  | 0.05 | 33.06      | 0.83  | 0.03 |
| 9  | 164.91   | -      | 175.94   | 172.37 | 156.75 | 114.63     | 134.60 | 113.35 | 164.91   | -     | -    | 168.36   | 10.21 | 0.06 | 120.86     | 11.92 | 0.10 |
| 10 | -        | -      | -        | -      | -      | -          | -      | -      | -        | -     | -    | -        | -     | -    | -          | -     | -    |
| 11 | 166.57   | 200.72 | -        | 154.31 | 142.89 | 81.00      | 118.42 | 101.84 | 183.64   | 24.15 | 0.13 | 148.60   | 8.08  | 0.05 | 100.42     | 18.75 | 0.19 |
| 12 | 187.59   | 172.32 | 168.58   | 166.52 | 167.86 | 79.33      | 94.81  | 95.68  | 179.96   | 10.80 | 0.06 | 167.65   | 1.04  | 0.01 | 89.94      | 9.20  | 0.10 |
| M  |          |        |          |        |        |            |        |        | 156.87   |       |      | 157.20   |       |      | 90.45      |       |      |
| SD |          |        |          |        |        |            |        |        | 31.83    |       |      | 30.38    |       |      | 34.20      |       |      |
| CV |          |        |          |        |        |            |        |        | 0.20     |       |      | 0.19     |       |      | 0.38       |       |      |

**Table S6.** Maximal isometric Adaptive Force ( $AF_{iso_{max}}$ ) (N) of hip flexors for baseline as well as pleasant and unpleasant imagery for each participant and trial. The individual and group arithmetic means (M), standard deviations (SD) and coefficient of variation (CV) are given.

|    | baseline |        | pleasant |        |        | unpleasant |        |        | baseline |       |      | pleasant |       |      | unpleasant |       |      |
|----|----------|--------|----------|--------|--------|------------|--------|--------|----------|-------|------|----------|-------|------|------------|-------|------|
|    | M1       | M2     | M1       | M2     | M3     | M1         | M2     | M3     | M        | SD    | CV   | M        | SD    | CV   | M          | SD    | CV   |
| 1  | -        | -      | -        | -      | -      | -          | -      | -      | -        | -     | -    | -        | -     | -    | -          | -     | -    |
| 2  | 200.02   | 171.11 | 192.09   | 208.92 | 174.84 | 55.37      | 83.08  | 104.99 | 185.56   | 20.44 | 0.11 | 191.95   | 17.04 | 0.09 | 81.14      | 24.87 | 0.31 |
| 3  | 184.54   | 155.64 | 169.87   | 189.10 | 190.14 | 156.84     | -      | 102.97 | 170.09   | 20.43 | 0.12 | 183.03   | 11.42 | 0.06 | 129.90     | 38.09 | 0.29 |
| 4  | 149.36   | 147.75 | 217.09   | 205.66 | 186.63 | 54.77      | 81.34  | 80.03  | 148.55   | 1.14  | 0.01 | 203.13   | 15.39 | 0.08 | 72.05      | 14.98 | 0.21 |
| 5  | 167.05   | 156.08 | 166.10   | -      | 143.41 | 118.42     | 113.06 | 100.81 | 161.57   | 7.76  | 0.05 | 154.76   | 16.05 | 0.10 | 110.76     | 9.03  | 0.08 |
| 6  | 168.04   | 121.55 | 113.60   | 127.77 | 128.66 | 64.30      | 103.26 | 116.85 | 144.80   | 32.88 | 0.23 | 123.34   | 8.45  | 0.07 | 94.80      | 27.28 | 0.29 |
| 7  |          | 161.92 | 159.94   | 180.48 | 160.05 | 210.10     | 173.64 | 178.12 | 161.92   | -     | -    | 166.82   | 11.83 | 0.07 | 187.28     | 19.88 | 0.11 |
| 8  | 132.87   | 100.45 | 93.83    |        | 89.96  | 31.48      | 30.53  | 34.84  | 116.66   | 22.93 | 0.20 | 91.90    | 2.74  | 0.03 | 32.28      | 2.27  | 0.07 |
| 9  | 155.62   | 150.77 | 147.84   | 171.14 | 135.36 | 110.01     | 133.33 | 121.98 | 153.20   | 3.43  | 0.02 | 151.45   | 18.16 | 0.12 | 121.77     | 11.67 | 0.10 |
| 10 | 178.00   | 168.49 | 196.12   |        | 179.57 | 207.01     | 181.20 | 160.91 | 173.25   | 6.72  | 0.04 | 187.84   | 11.70 | 0.06 | 183.04     | 23.10 | 0.13 |
| 11 | 144.25   | 152.97 | 153.11   | 143.64 | 134.19 | 136.82     | 110.39 | 103.95 | 148.61   | 6.17  | 0.04 | 143.65   | 9.46  | 0.07 | 117.05     | 17.42 | 0.15 |
| 12 | 164.07   | 169.85 | 130.04   | 134.71 | 152.08 | 105.95     | 132.89 | 139.45 | 166.96   | 4.08  | 0.02 | 138.94   | 11.61 | 0.08 | 126.10     | 17.75 | 0.14 |
| M  |          |        |          |        |        |            |        |        | 157.38   |       |      | 157.89   |       |      | 114.20     |       |      |
| SD |          |        |          |        |        |            |        |        | 18.24    |       |      | 33.13    |       |      | 45.28      |       |      |
| CV |          |        |          |        |        |            |        |        | 0.12     |       |      | 0.21     |       |      | 0.40       |       |      |

**Table S7.** Adaptive Force at onset of oscillations (AFosc) (N) of elbow flexors for baseline as well as pleasant and unpleasant imagery for each participant and trial. The individual and group arithmetic means (M), standard deviations (SD) and coefficient of variation (CV) are given.

|    | baseline |        | pleasant |        |        | unpleasant |        |        | baseline |       |      | pleasant |       |      | unpleasant |       |      |
|----|----------|--------|----------|--------|--------|------------|--------|--------|----------|-------|------|----------|-------|------|------------|-------|------|
|    | M1       | M2     | M1       | M2     | M3     | M1         | M2     | M3     | M        | SD    | CV   | M        | SD    | CV   | M          | SD    | CV   |
| 1  | 96.79    | 107.32 | 169.64   | 114.75 | 256.91 | 158.59     | 149.94 | 242.82 | 102.05   | 7.44  | 0.07 | 180.43   | 71.69 | 0.40 | 183.78     | 51.31 | 0.28 |
| 2  | 113.80   | 216.94 | 157.05   | 157.16 | 132.31 | 122.76     | 140.19 | 127.07 | 165.37   | 72.93 | 0.44 | 148.84   | 14.32 | 0.10 | 130.01     | 9.08  | 0.07 |
| 3  | 140.62   | 151.20 | 130.08   | 133.17 | 130.82 | 152.34     | 139.26 | 138.18 | 145.91   | 7.48  | 0.05 | 131.35   | 1.61  | 0.01 | 143.26     | 7.88  | 0.06 |
| 4  | 117.37   | 171.28 | 203.39   | 167.27 | 158.65 | 143.66     | 235.41 | 170.34 | 144.33   | 38.12 | 0.26 | 176.44   | 23.74 | 0.13 | 183.13     | 47.20 | 0.26 |
| 5  | 90.06    | 122.53 | 110.97   | 131.83 | 118.54 | 187.33     | 189.03 | 181.66 | 106.29   | 22.96 | 0.22 | 120.45   | 10.56 | 0.09 | 186.01     | 3.86  | 0.02 |
| 6  | 132.82   | 81.93  | 102.54   | 130.46 | 127.98 | 206.32     | 185.43 | 177.10 | 107.38   | 35.99 | 0.34 | 120.32   | 15.45 | 0.13 | 189.62     | 15.05 | 0.08 |
| 7  | -        | -      | -        | -      | -      | -          | -      | -      | -        | -     | -    | -        | -     | -    | -          | -     | -    |
| 8  | 57.25    | 56.37  | 65.83    | 63.47  | 53.60  | 130.88     | 122.18 | 161.15 | 56.81    | 0.63  | 0.01 | 60.97    | 6.49  | 0.11 | 138.07     | 20.46 | 0.15 |
| 9  | 100.65   | -      | 139.75   | 96.48  | 180.39 | 181.22     | 176.51 | 179.21 | 100.65   | -     | -    | 138.87   | 41.97 | 0.30 | 178.98     | 2.36  | 0.01 |
| 10 | -        | -      | -        | -      | -      | -          | -      | -      | -        | -     | -    | -        | -     | -    | -          | -     | -    |
| 11 | 142.36   | 96.97  | -        | 116.52 | 89.26  | 140.05     | 111.43 | 90.89  | 119.67   | 32.09 | 0.27 | 102.89   | 19.27 | 0.19 | 114.12     | 24.69 | 0.22 |
| 12 | 113.86   | 107.85 | 125.79   | 148.34 | 133.36 | 162.08     | 147.87 | 195.47 | 110.85   | 4.25  | 0.04 | 135.83   | 11.47 | 0.08 | 168.47     | 24.43 | 0.15 |
| M  |          |        |          |        |        |            |        |        | 115.93   |       |      | 131.64   |       |      | 161.54     |       |      |
| SD |          |        |          |        |        |            |        |        | 30.33    |       |      | 34.69    |       |      | 27.54      |       |      |
| CV |          |        |          |        |        |            |        |        | 0.26     |       |      | 0.26     |       |      | 0.17       |       |      |



**Table S8.** Adaptive Force at onset of oscillations (AFosc) (N) of hip flexors for baseline as well as pleasant and unpleasant imagery for each participant and trial. The individual and group arithmetic means (M), standard deviations (SD) and coefficient of variation (CV) are given.

|    | baseline |        | pleasant |        |        | unpleasant |        |        | baseline |       |      | pleasant |       |      | unpleasant |       |      |
|----|----------|--------|----------|--------|--------|------------|--------|--------|----------|-------|------|----------|-------|------|------------|-------|------|
|    | M1       | M2     | M1       | M2     | M3     | M1         | M2     | M3     | M        | SD    | CV   | M        | SD    | CV   | M          | SD    | CV   |
| 1  | -        | -      | -        | -      | -      | -          | -      | -      | -        | -     | -    | -        | -     | -    | -          | -     | -    |
| 2  | 146.34   | 130.52 | 179.23   | 109.27 | 124.42 | 160.75     | 184.39 | 156.40 | 138.43   | 11.18 | 0.08 | 137.64   | 36.80 | 0.27 | 167.18     | 15.06 | 0.09 |
| 3  | 148.75   | 147.11 | 166.77   | 174.28 | 190.14 | 131.95     | -      | 153.28 | 147.93   | 1.16  | 0.01 | 177.06   | 11.93 | 0.07 | 142.61     | 15.08 | 0.11 |
| 4  | 92.19    | 128.50 | 120.94   | 194.83 | 123.58 | 159.36     | 222.24 | 98.22  | 110.35   | 25.67 | 0.23 | 146.45   | 41.92 | 0.29 | 159.94     | 62.01 | 0.39 |
| 5  | 125.92   | 81.56  | 154.07   | -      | 71.94  | 74.79      | 178.95 | 96.84  | 103.74   | 31.37 | 0.30 | 113.00   | 58.08 | 0.51 | 116.86     | 54.89 | 0.47 |
| 6  | 109.37   | 94.87  | 78.83    | 77.87  | 205.84 | 127.65     | 60.07  | 197.43 | 102.12   | 10.25 | 0.10 | 120.85   | 73.61 | 0.61 | 128.38     | 68.69 | 0.54 |
| 7  |          | 127.19 | 89.32    | 132.08 | 134.50 | 193.36     | 188.78 | 116.63 | 127.19   | -     | -    | 118.63   | 25.41 | 0.21 | 166.26     | 43.04 | 0.26 |
| 8  | 67.15    | 48.89  | 45.39    |        | 47.06  | 178.68     | 185.90 | 134.98 | 58.02    | 12.91 | 0.22 | 46.22    | 1.18  | 0.03 | 166.52     | 27.55 | 0.17 |
| 9  | 67.57    | 64.48  | 70.02    | 78.37  | 142.22 | 91.56      | 104.19 | 114.18 | 66.02    | 2.18  | 0.03 | 96.87    | 39.49 | 0.41 | 103.31     | 11.34 | 0.11 |
| 10 | 130.99   | 106.63 | 121.19   |        | 108.13 | 115.95     | 133.42 | 195.57 | 118.81   | 17.23 | 0.14 | 114.66   | 9.24  | 0.08 | 148.31     | 41.85 | 0.28 |
| 11 | 82.02    | 75.35  | 98.27    | 100.10 | 108.22 | 95.04      | 104.92 | 96.40  | 78.69    | 4.71  | 0.06 | 102.20   | 5.30  | 0.05 | 98.79      | 5.36  | 0.05 |
| 12 | 121.04   | 97.57  | 189.06   | 116.44 | 147.25 | 96.40      | 129.30 | 133.53 | 109.31   | 16.60 | 0.15 | 150.91   | 36.45 | 0.24 | 119.74     | 20.33 | 0.17 |
| M  |          |        |          |        |        |            |        |        | 105.51   |       |      | 120.41   |       |      | 137.99     |       |      |
| SD |          |        |          |        |        |            |        |        | 28.49    |       |      | 34.05    |       |      | 25.86      |       |      |
| CV |          |        |          |        |        |            |        |        | 0.27     |       |      | 0.28     |       |      | 0.19       |       |      |

**Table S9.** Logarithmic slope of force rise (lg(N/s)) of elbow flexors for baseline as well as pleasant and unpleasant imagery for each participant and trial. The individual and group arithmetic means (M), standard deviations (SD) and coefficient of variation (CV) are given.

|    | baseline |      | pleasant |      |      | unpleasant |      |      | baseline |      |      | pleasant |      |      | unpleasant |      |      |
|----|----------|------|----------|------|------|------------|------|------|----------|------|------|----------|------|------|------------|------|------|
|    | M1       | M2   | M1       | M2   | M3   | M1         | M2   | M3   | M        | SD   | CV   | M        | SD   | CV   | M          | SD   | CV   |
| 1  | 1.78     | 1.90 | 2.07     | 1.96 | 2.00 | 2.08       | 2.09 | 2.11 | 1.84     | 0.09 | 0.05 | 2.01     | 0.06 | 0.03 | 2.09       | 0.02 | 0.01 |
| 2  | 1.68     | 2.00 | 1.95     | 2.01 | 1.99 | 1.87       | 1.89 | 1.97 | 1.84     | 0.22 | 0.12 | 1.98     | 0.03 | 0.02 | 1.91       | 0.05 | 0.03 |
| 3  | 2.11     | 1.87 | 1.94     | 1.93 | 1.89 | 1.97       | 2.02 | 1.78 | 1.99     | 0.17 | 0.09 | 1.92     | 0.02 | 0.01 | 1.92       | 0.13 | 0.07 |
| 4  | 2.01     | 1.98 | 1.95     | 1.93 | 2.06 | 1.95       | 1.94 | 1.90 | 2.00     | 0.02 | 0.01 | 1.98     | 0.07 | 0.04 | 1.93       | 0.03 | 0.01 |
| 5  | 1.74     | 1.79 | 1.78     | 1.92 | 1.76 | 1.82       | 1.79 | 1.76 | 1.77     | 0.04 | 0.02 | 1.82     | 0.09 | 0.05 | 1.79       | 0.03 | 0.02 |
| 6  | 1.98     | -    | 1.88     | 1.88 | 2.01 | 2.06       | 1.82 | 1.92 | 1.98     | -    | -    | 1.92     | 0.08 | 0.04 | 1.93       | 0.12 | 0.06 |
| 7  | -        | -    | -        | -    | -    | -          | -    | -    | -        | -    | -    | -        | -    | -    | -          | -    | -    |
| 8  | 1.55     | 1.65 | 1.49     | 1.53 | 1.42 | 1.37       | 1.50 | 1.43 | 1.60     | 0.07 | 0.04 | 1.48     | 0.06 | 0.04 | 1.43       | 0.06 | 0.04 |
| 9  | 1.71     | -    | 1.79     | -    | 1.94 | 1.90       | 1.85 | 1.85 | 1.71     | -    | -    | 1.86     | 0.10 | 0.06 | 1.87       | 0.03 | 0.02 |
| 10 | -        | -    | -        | -    | -    | -          | -    | -    | -        | -    | -    | -        | -    | -    | -          | -    | -    |
| 11 | 1.73     | 1.98 | -        | 1.88 | 1.91 | 1.96       | 1.98 | -    | 1.85     | 0.18 | 0.09 | 1.89     | 0.02 | 0.01 | 1.97       | 0.01 | 0.01 |
| 12 | 1.86     | 1.90 | 1.93     | 2.06 | 2.00 | 1.85       | 1.92 | 1.85 | 1.88     | 0.03 | 0.02 | 2.00     | 0.07 | 0.03 | 1.87       | 0.04 | 0.02 |
| M  |          |      |          |      |      |            |      |      | 1.85     |      |      |          | 1.89 |      |            |      | 1.87 |
| SD |          |      |          |      |      |            |      |      | 0.13     |      |      |          | 0.16 |      |            |      | 0.17 |
| CV |          |      |          |      |      |            |      |      | 0.07     |      |      |          | 0.08 |      |            |      | 0.09 |

**Table S10.** Logarithmic slope of force rise (lg(N/s)) of hip flexors for baseline as well as pleasant and unpleasant imagery for each participant and trial. The individual and group arithmetic means (M), standard deviations (SD) and coefficient of variation (CV) are given.

|    | baseline |      | pleasant |      |      | unpleasant |      |      | baseline |      |      | pleasant |      |      | unpleasant |      |      |
|----|----------|------|----------|------|------|------------|------|------|----------|------|------|----------|------|------|------------|------|------|
|    | M1       | M2   | M1       | M2   | M3   | M1         | M2   | M3   | M        | SD   | CV   | M        | SD   | CV   | M          | SD   | CV   |
| 1  | -        | -    | -        | -    | -    | -          | -    | -    | -        | -    | -    | -        | -    | -    | -          | -    | -    |
| 2  | 2.06     | 1.85 | 1.86     | 1.99 | 2.00 | 1.68       | 2.15 | 1.98 | 1.96     | 0.15 | 0.08 | 1.95     | 0.08 | 0.04 | 1.94       | 0.24 | 0.12 |
| 3  | 2.02     | 1.96 | 1.99     | 2.13 | 1.99 | 2.02       | -    | 1.92 | 1.99     | 0.04 | 0.02 | 2.04     | 0.08 | 0.04 | 1.97       | 0.07 | 0.04 |
| 4  | 2.07     | 1.91 | 2.14     | 2.12 | 1.87 | 1.74       | 1.92 | 1.95 | 1.99     | 0.11 | 0.06 | 2.05     | 0.15 | 0.07 | 1.87       | 0.12 | 0.06 |
| 5  | 1.86     | 1.61 | 1.95     | -    | -    | 1.85       | 2.00 | -    | 1.73     | 0.18 | 0.10 | 1.95     | -    | -    | 1.93       | 0.10 | 0.05 |
| 6  | 1.94     | 2.12 | -        | -    | 1.78 | 2.12       | -    | 1.96 | 2.03     | -    | -    | 1.78     | -    | -    | 2.04       | 0.11 | 0.06 |
| 7  | -        | -    | -        | -    | -    | 1.97       | 1.96 | -    | -        | -    | -    | -        | -    | -    | 1.97       | 0.01 | 0.01 |
| 8  | 1.60     | 1.54 | 1.46     | -    | 1.47 | 1.54       | 1.46 | 1.44 | 1.57     | 0.05 | 0.03 | 1.46     | 0.01 | 0.01 | 1.48       | 0.05 | 0.04 |
| 9  | -        | -    | 1.72     | -    | 2.01 | 1.90       | -    | 1.90 | -        | -    | -    | 1.87     | 0.21 | 0.11 | 1.90       | 0.00 | 0.00 |
| 10 | -        | -    | -        | -    | 1.94 | 2.03       | -    | 1.88 | -        | -    | -    | 1.94     | -    | -    | 1.96       | 0.10 | 0.05 |
| 11 | 1.88     | -    | 1.85     | 1.91 | 1.92 | 1.99       | 1.92 | -    | 1.88     | -    | -    | 1.89     | 0.03 | 0.02 | 1.95       | 0.05 | 0.03 |
| 12 | 1.89     | 1.84 | 1.96     | -    | 2.04 | -          | 1.92 | 1.99 | 1.86     | 0.04 | 0.02 | 2.00     | 0.06 | 0.03 | 1.95       | 0.05 | 0.03 |
| M  |          |      |          |      |      |            |      |      | 1.88     |      |      |          | 1.89 |      |            |      | 1.90 |
| SD |          |      |          |      |      |            |      |      | 0.16     |      |      |          | 0.17 |      |            |      | 0.15 |
| CV |          |      |          |      |      |            |      |      | 0.08     |      |      |          | 0.09 |      |            |      | 0.08 |
